# Supplementary material
Source: PubMed Central journal article supplement (PMC5927819)

# Supporting Information

## Elucidating the Interdependence of Drug Resistance from Combinations of Mutations

Debra A. Ragland<sup>1</sup>, Troy W. Whitfield<sup>2,3</sup>, Sook-Kyung Lee<sup>4</sup>, Ronald Swanstrom<sup>4</sup>, Konstantin B. Zeldovich<sup>3</sup>,  
Nese Kurt-Yilmaz<sup>1</sup> and Celia A. Schiffer<sup>1,\*</sup>

<sup>1</sup>Department of Biochemistry and Molecular Pharmacology, <sup>2</sup>Department of Medicine, <sup>3</sup>Program in Bioinformatics and Integrative Biology, University of Massachusetts Medical School, Worcester, MA 01605, USA

<sup>4</sup>Department of Biochemistry and Biophysics, and the UNC Center for AIDS Research, University of North Carolina at Chapel Hill, Chapel Hill, NC 27599, USA

\*Corresponding Author

**Table S1.** EC<sub>50</sub> values for clinically-derived HIV-1 protease variants determined by cell-based assays at the Swanstrom laboratory at UNC-Chapel Hill (unpublished data), and fold changes relative to wild type NL4-3. Note that EC<sub>50</sub> value for variant ATA<sub>21</sub> could not be determined.

**Figure S1.** Sequence identity matrix for all 15 HIV-1 protease variants in the panel. Values are colored from blue to red for high to low % identities.

**Figure S2.** Root mean square deviation (RMSD) values for MD simulations of HIV-1 protease variants. **A.** DRV accessory RAMs L76V, V32I, L33F, and V32I+L33F compared to SF-2 WT. **B.** Viral passaging variants I84V, I93L, DRV<sup>f</sup>8 and DRV<sup>f</sup>10 compared to NL4-3 WT. **C.** Clinically-derived variants compared to SF-2 WT.

**Figure S3.** The variance of hydrogen bond occupancies among the variants is largely accounted for by the first principal component (eigenvalue spectrum, proportion of variance). The first principal component for the mean hydrogen bond occupancy dataset accounts for 89% of the variance.

**Figure S4.** The variance of mean van der Waals energy is accounted for by the first principal component (eigenvalue spectrum, proportion of variance). The first principal component for the mean van der Waals energy dataset accounts for 97.6% of the variance.

**Figure S5.** Mean hydrogen bond occupancies share similarities with sequence and dynamics. **A.** Fifteen sequence variants projected onto the first two principal components for the correlation matrix of 143 dynamic hydrogen bond occupancies. Variants are partitioned into three groups, those variants possessing K41 (black), those

possessing R41, (bold, purple) and those possessing a combination of substitutions at positions 41, 10, and 54 simultaneously (bold, blue). **B.** List of top five single positions found to most likely underlie alterations in hydrogen bond occupancy patterns. **C.** List of top five position pairs found to most likely underlie hydrogen bond occupancy changes.

**Figure S6.** Density distribution of 15 variants along the first principal component  $\rho(u_1)$  for the 111 mean hydrogen bond occupancies seen in Figure 3A.

**Figure S7.** Density distribution of 15 variants along the first principal component  $\rho(u_1)$  for the 64 mean van der Waals contact energies seen in Figure 5A.

| <b>EC<sub>50</sub> Values for Clinically-Derived Variants</b> |                        |                              |
|---------------------------------------------------------------|------------------------|------------------------------|
|                                                               | EC <sub>50</sub> in nM | Fold Change EC <sub>50</sub> |
| <b>NL4-3</b>                                                  | 3.98                   |                              |
| <b>ATA<sub>21</sub></b>                                       | -                      | -                            |
| <b>KY<sub>26</sub></b>                                        | 1160                   | 291                          |
| <b>SLK<sub>19</sub></b>                                       | 32.5                   | 8                            |
| <b>VEG<sub>23</sub></b>                                       | 7800                   | 1960                         |
| <b>VSL<sub>23</sub></b>                                       | 320                    | 80                           |

|        | SF-2 | NL4-3 | L76V | L33F | V32I | DM  | I84V | I93L | DRV'8 | DRV'10 | ATA | KY  | SLK | VEG | VSL |
|--------|------|-------|------|------|------|-----|------|------|-------|--------|-----|-----|-----|-----|-----|
| SF-2   | 100  | 95    | 99   | 99   | 99   | 98  | 94   | 94   | 87    | 85     | 79  | 74  | 81  | 77  | 77  |
| NL4-3  | 95   | 100   | 94   | 94   | 94   | 93  | 99   | 99   | 92    | 90     | 78  | 75  | 80  | 76  | 78  |
| L76V   | 99   | 94    | 100  | 98   | 98   | 97  | 93   | 93   | 86    | 86     | 78  | 73  | 80  | 76  | 76  |
| L33F   | 99   | 94    | 98   | 100  | 98   | 99  | 93   | 93   | 88    | 86     | 80  | 75  | 80  | 78  | 78  |
| V32I   | 99   | 94    | 98   | 98   | 100  | 99  | 93   | 93   | 88    | 86     | 80  | 75  | 80  | 78  | 76  |
| DM     | 98   | 93    | 97   | 99   | 99   | 100 | 92   | 92   | 89    | 87     | 81  | 76  | 79  | 79  | 77  |
| I84V   | 94   | 99    | 93   | 93   | 93   | 92  | 100  | 98   | 93    | 91     | 79  | 74  | 79  | 77  | 77  |
| I93L   | 94   | 99    | 93   | 93   | 93   | 92  | 98   | 100  | 91    | 89     | 77  | 74  | 79  | 75  | 79  |
| DRV'8  | 87   | 92    | 86   | 88   | 88   | 89  | 93   | 91   | 100   | 98     | 80  | 76  | 75  | 78  | 75  |
| DRV'10 | 85   | 90    | 86   | 86   | 86   | 87  | 91   | 89   | 98    | 100    | 78  | 75  | 75  | 78  | 75  |
| ATA    | 79   | 78    | 78   | 80   | 80   | 81  | 79   | 77   | 80    | 78     | 100 | 79  | 73  | 88  | 74  |
| KY     | 74   | 75    | 73   | 75   | 75   | 76  | 74   | 74   | 76    | 75     | 79  | 100 | 68  | 77  | 74  |
| SLK    | 81   | 80    | 80   | 80   | 80   | 79  | 79   | 79   | 75    | 75     | 73  | 68  | 100 | 73  | 80  |
| VEG    | 77   | 76    | 76   | 78   | 78   | 79  | 77   | 75   | 78    | 78     | 88  | 77  | 73  | 100 | 75  |
| VSL    | 77   | 78    | 76   | 78   | 76   | 77  | 77   | 79   | 75    | 75     | 74  | 74  | 80  | 75  | 100 |

**A. Accessory DRV RAMs**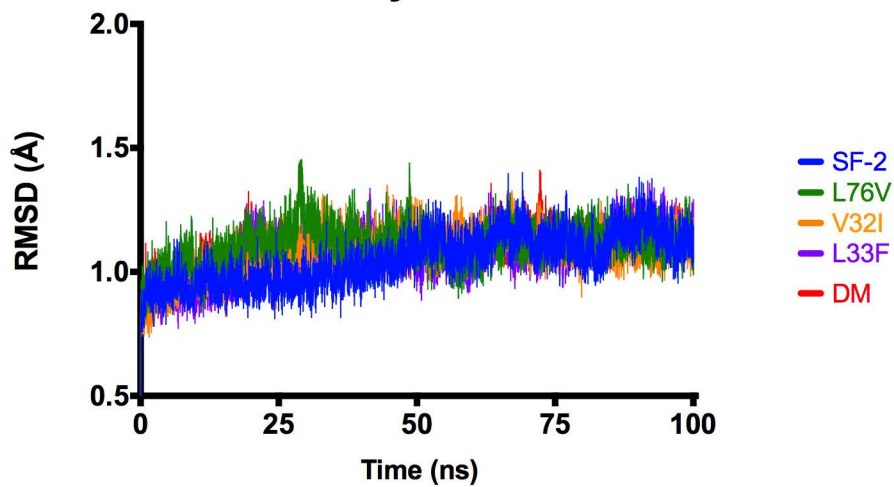**B. Viral Passing Variants**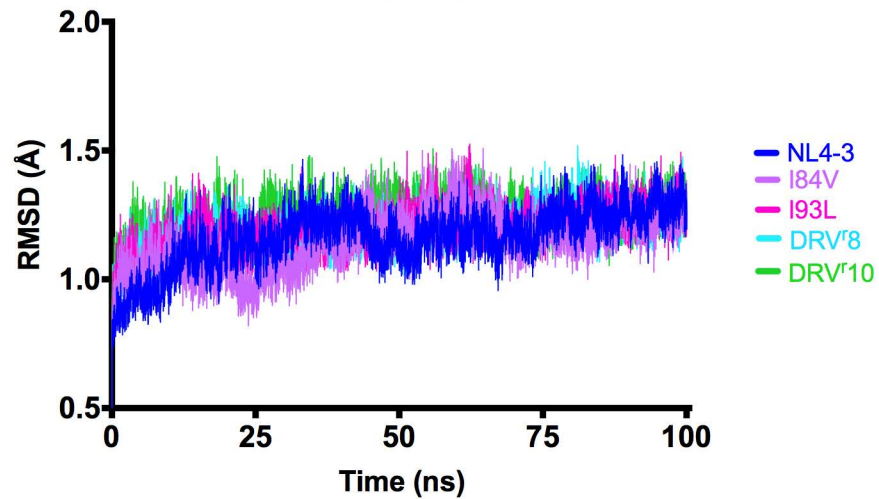**C. Clinically-Derived Variants**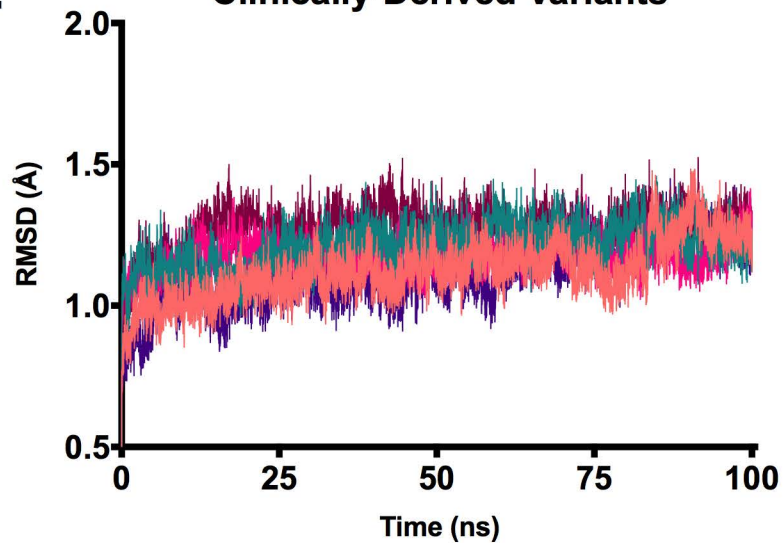

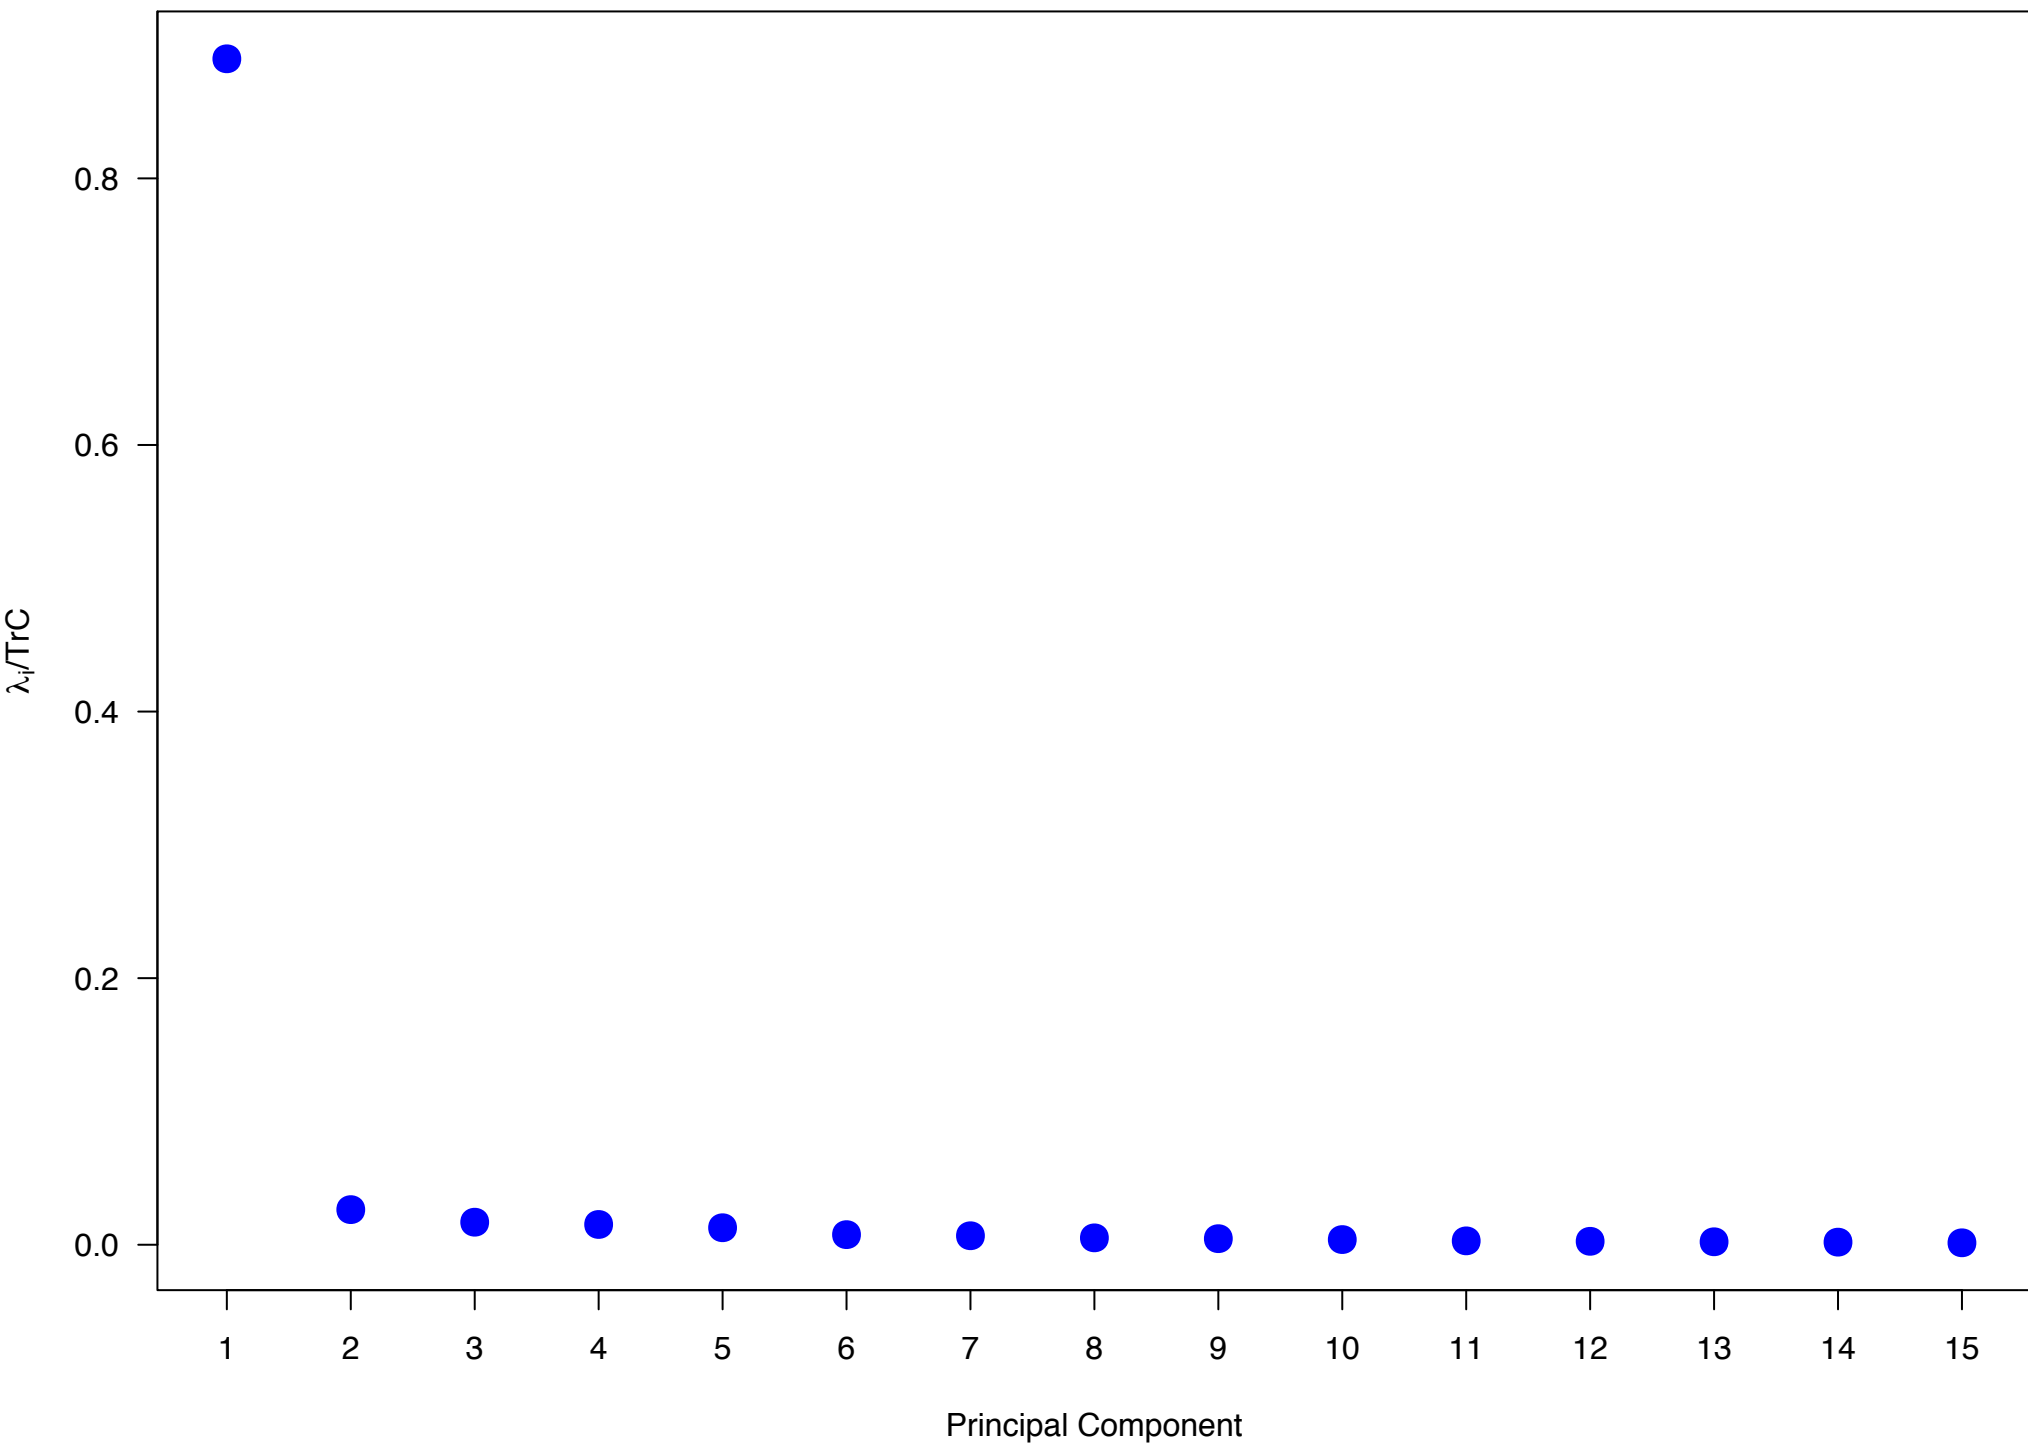

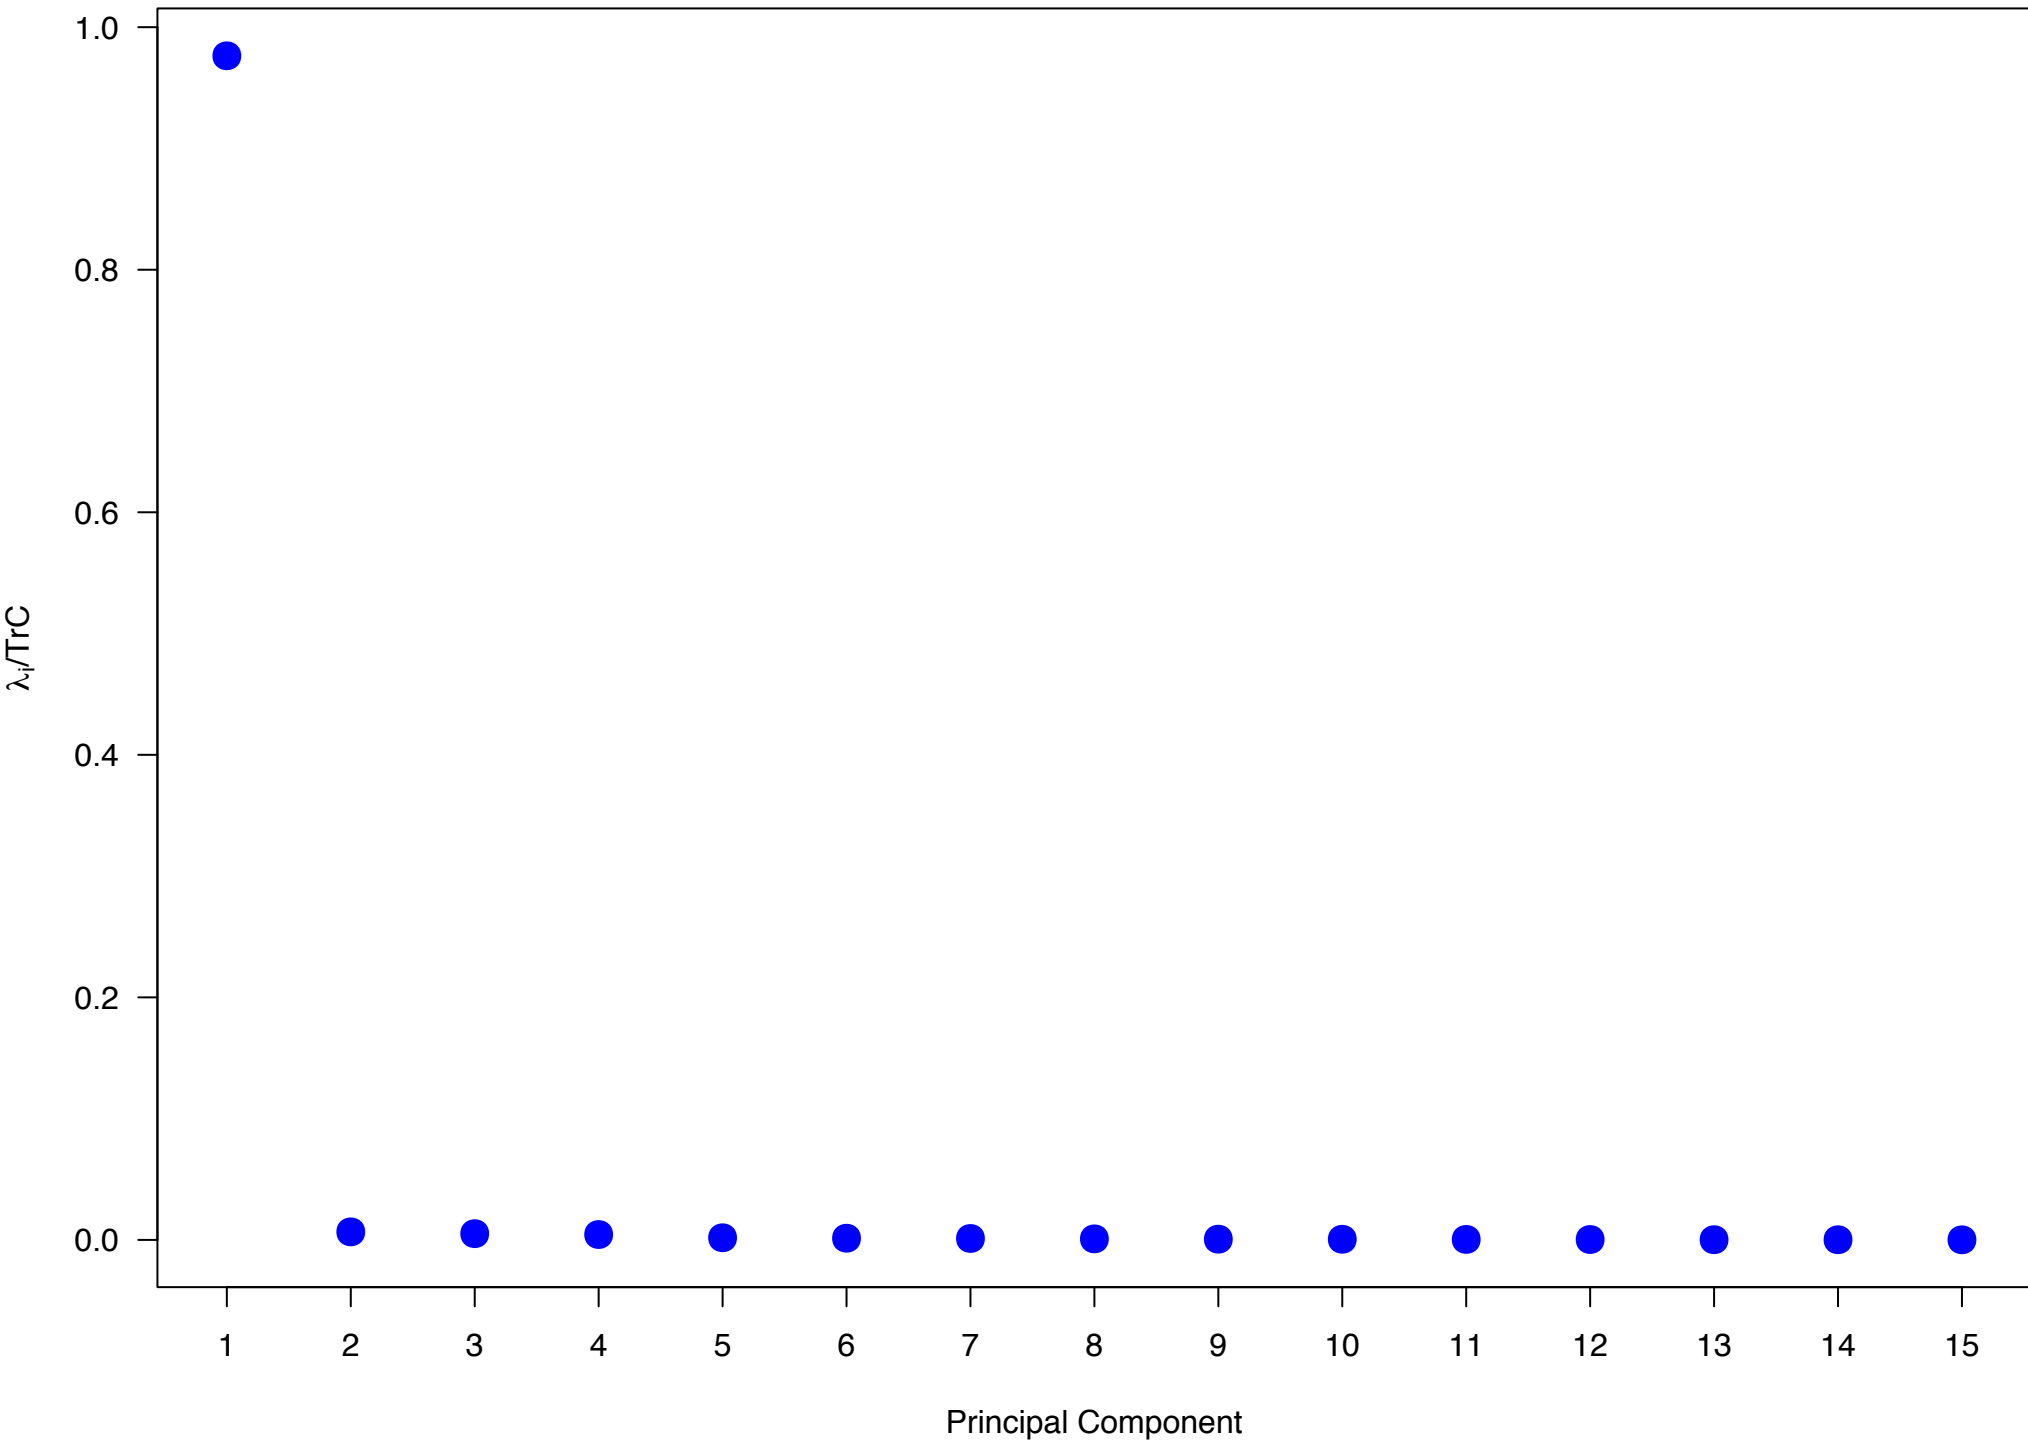



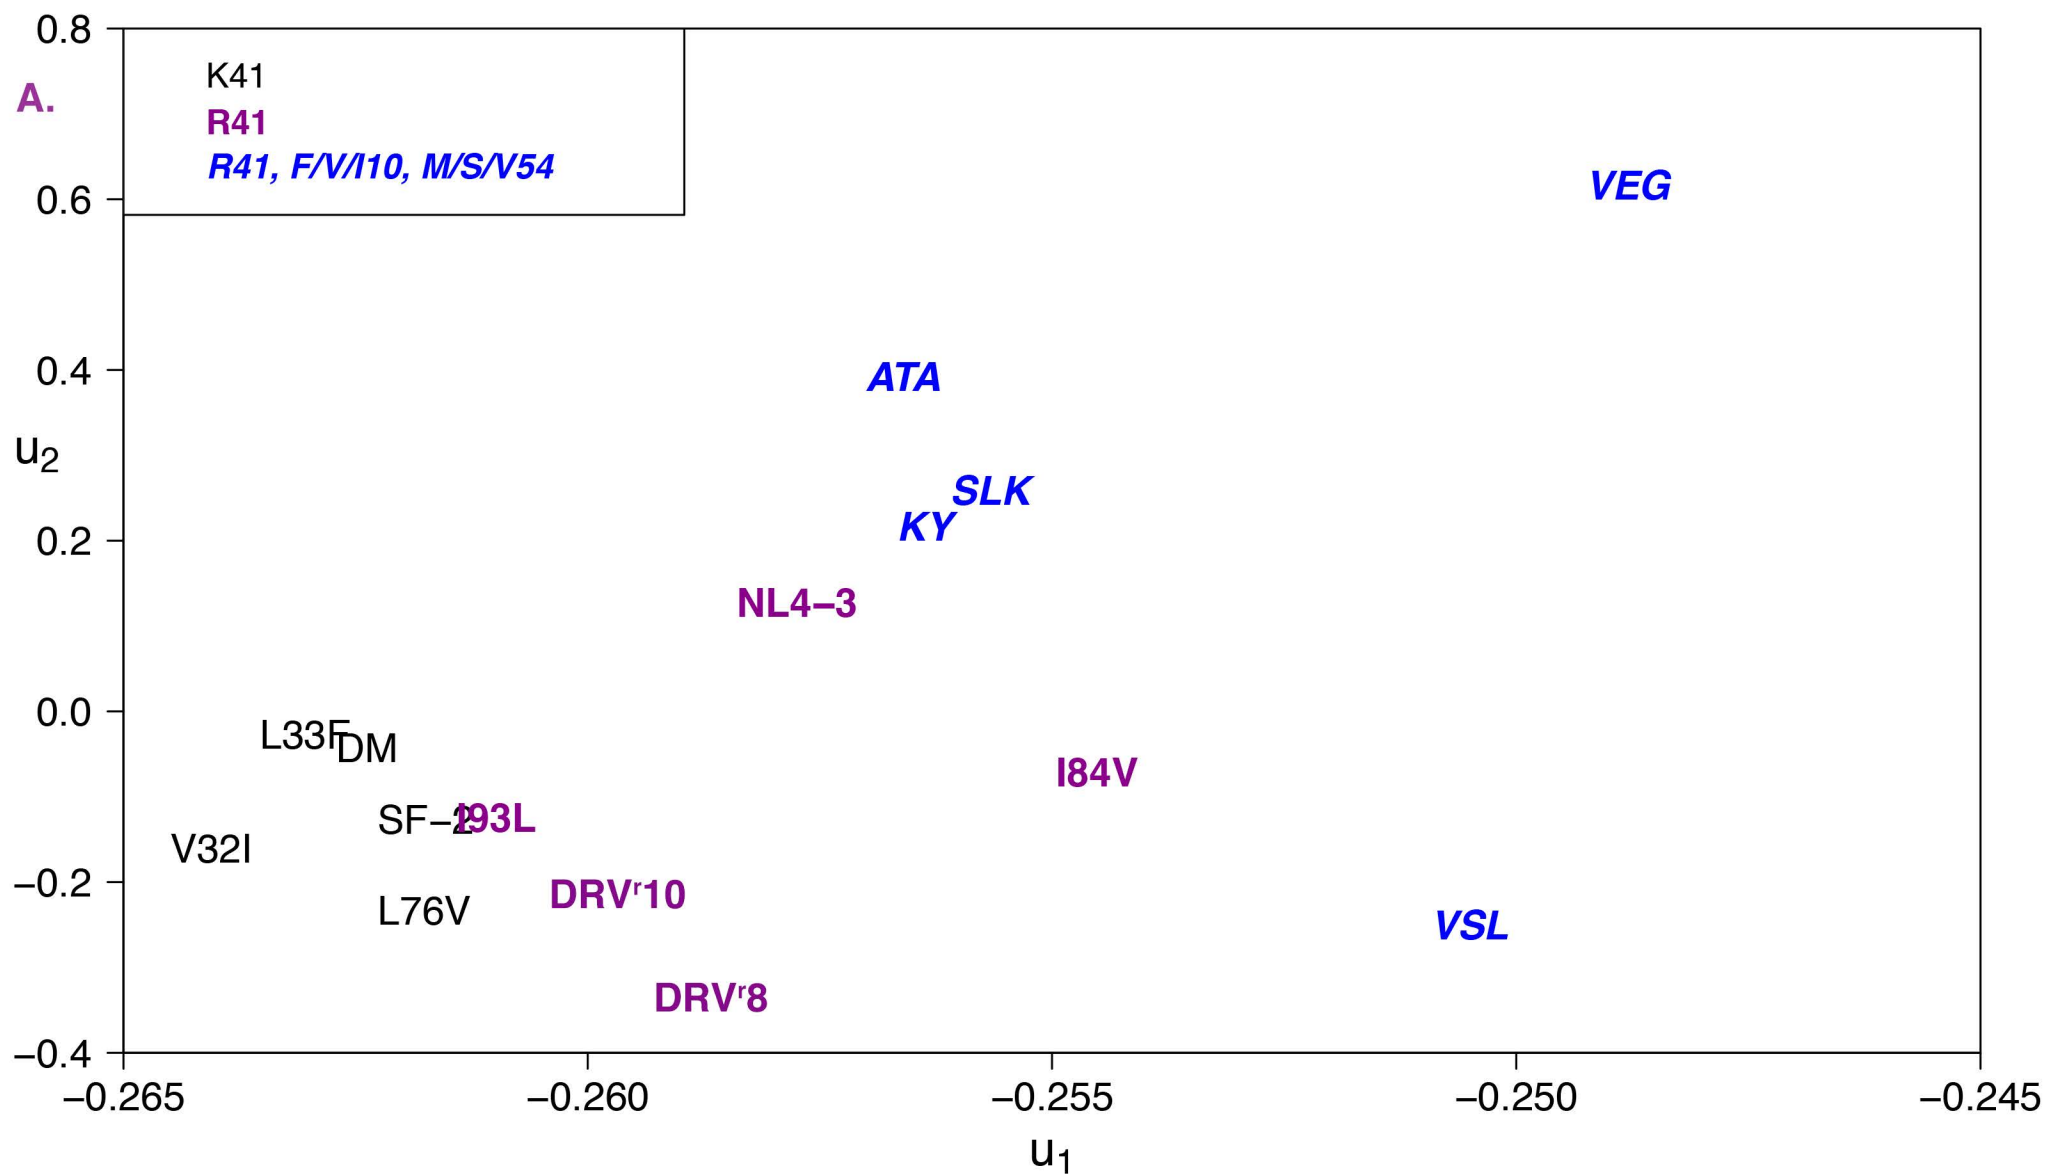

**B.**

| Residue Position | p-value  |
|------------------|----------|
| 41               | 0.000666 |
| 10               | 0.00466  |
| 54               | 0.00466  |
| 37               | 0.00879  |
| 35               | 0.0102   |

**C.**

| Residue Position 1 | Residue Position 2 | p-value |
|--------------------|--------------------|---------|
| 10                 | 41                 | 0.00466 |
| 10                 | 54                 | 0.00466 |
| 41                 | 54                 | 0.00466 |
| 10                 | 71                 | 0.00586 |
| 54                 | 71                 | 0.00586 |

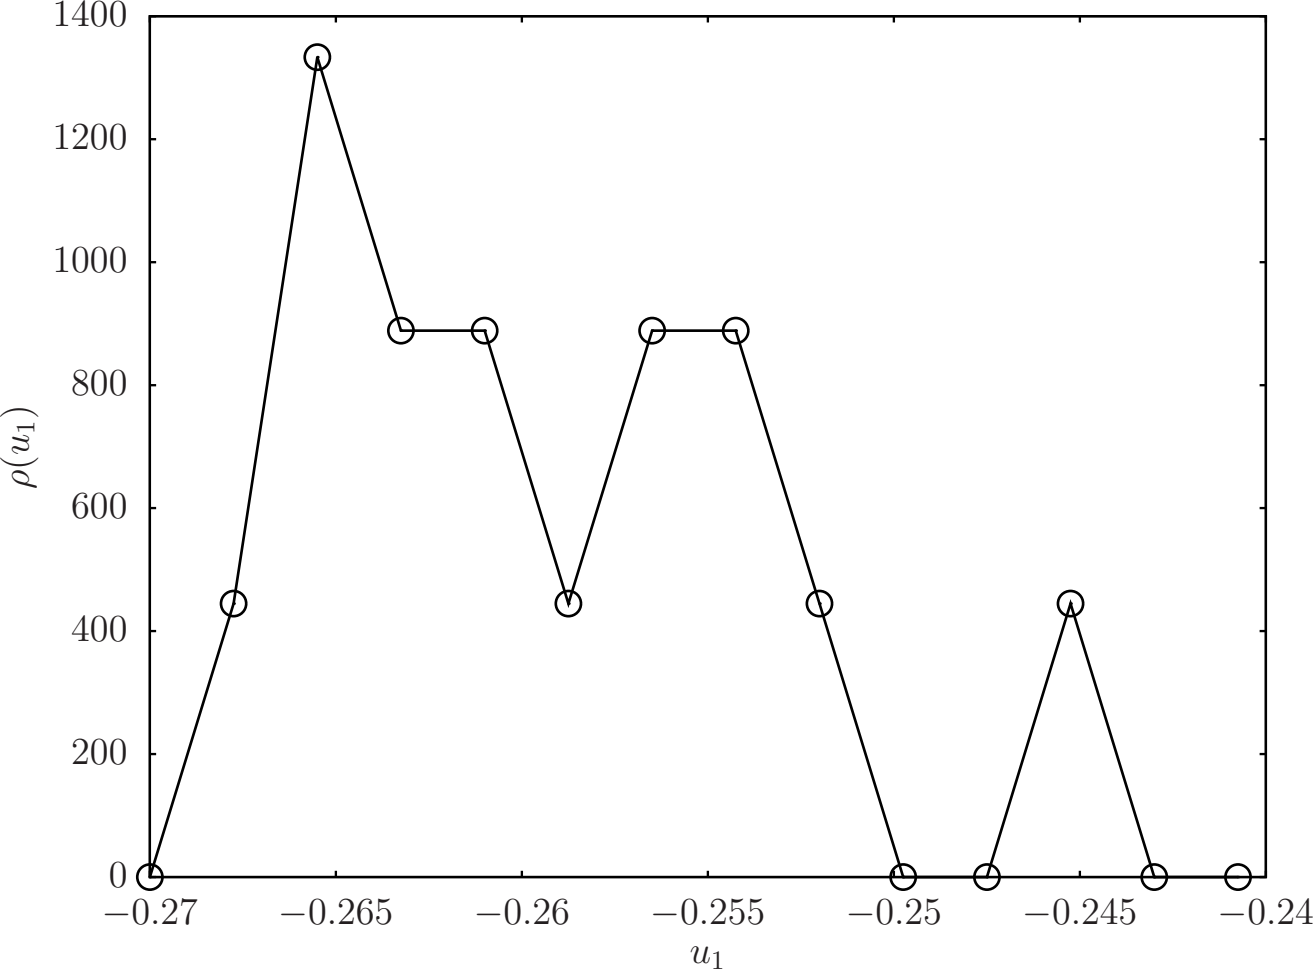

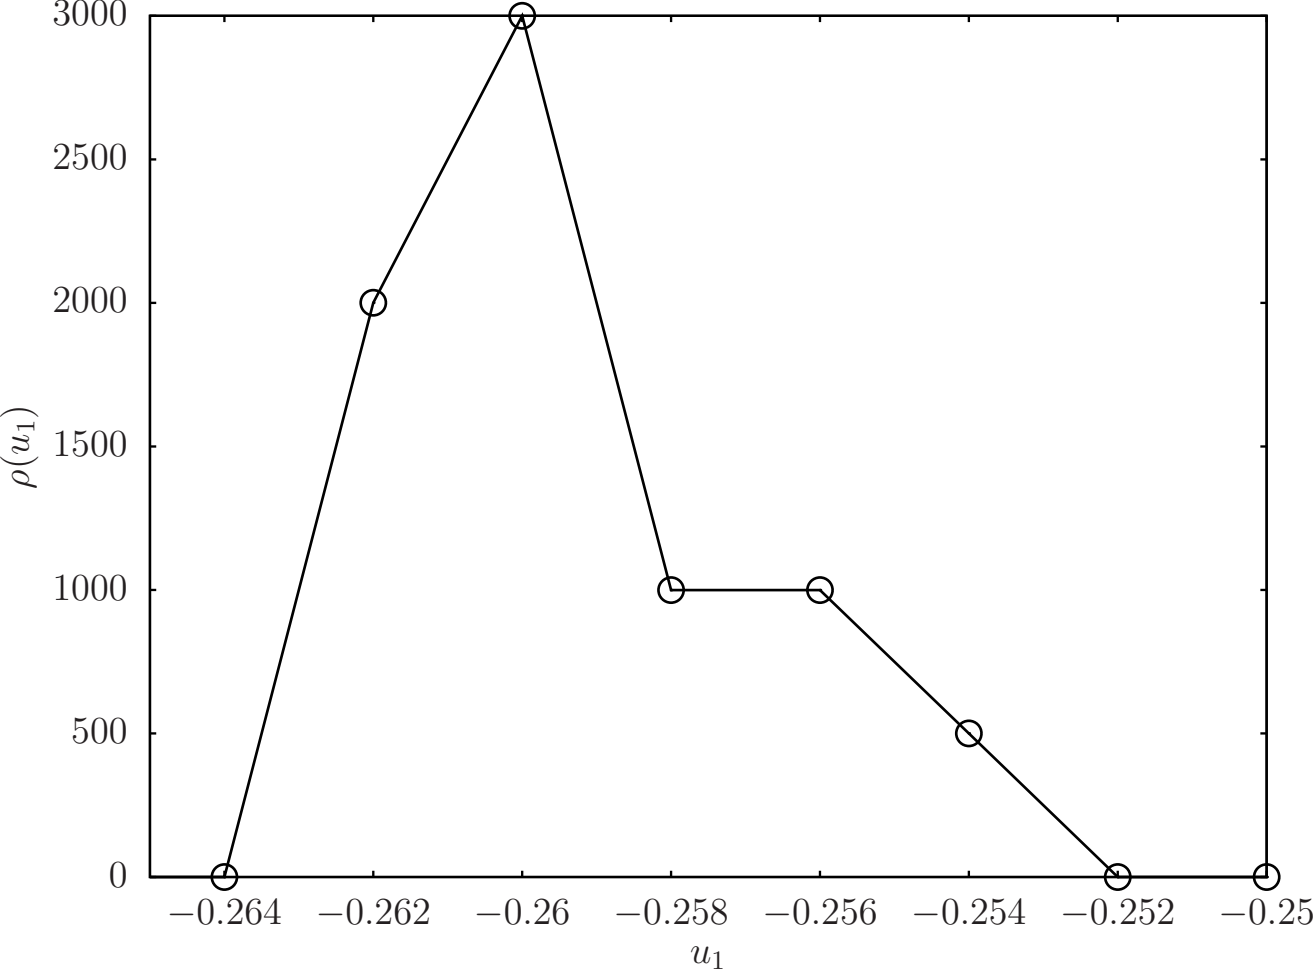

Supplement: NIHMS926772-supplement-Supplement.pdf [file NIHMS926772-supplement-Supplement.pdf]
